# Supplementary material for: Adipose-derived stem cells inhibit dermal fibroblast growth and induce apoptosis in keloids through the arachidonic acid-derived cyclooxygenase-2/prostaglandin E2 cascade by paracrine
Source: PubMed Central journal article supplement — Burns Trauma. 2021 Sep 11;9:tkab020. doi: 10.1093/burnst/tkab020 (PMC8430279; doi:10.1093/burnst/tkab020), 2021-09-11
Supplement: supplementary_files_tkab020.pdf [file supplementary_files_tkab020.pdf]

# The immunophenotype and differentiation of Adipose-derived stem cells (ADSCs)

## 1. The immunophenotype of ADSCs

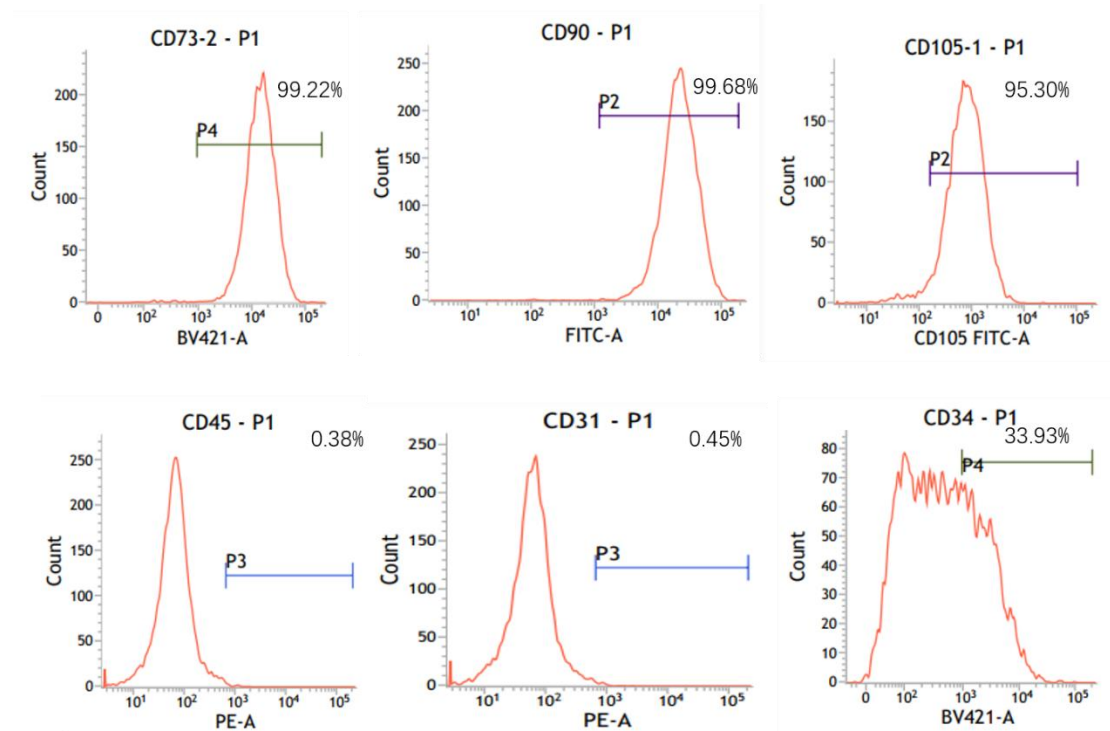

**Figure 1** The immunophenotype of ADSCs by flow cytometry

Cell surface marker expression was examined using fluorochrome-conjugated antihuman CD105-FITC (fluorescein isothiocyanate), CD73-BV421, CD90-FITC, CD31-PE (phycoerythrin), CD34-BV421, and CD45-PE antibodies or the respective isotype controls (BD Biosciences) in accordance with the manufacturer's instructions. The labeled cells were analyzed by multiparameter flow cytometry using a FACSCanto cytometer and Diva software (BD Biosciences).

## 2. ADSCs Differentiation Assay

### 2.1 Adipogenic differentiation

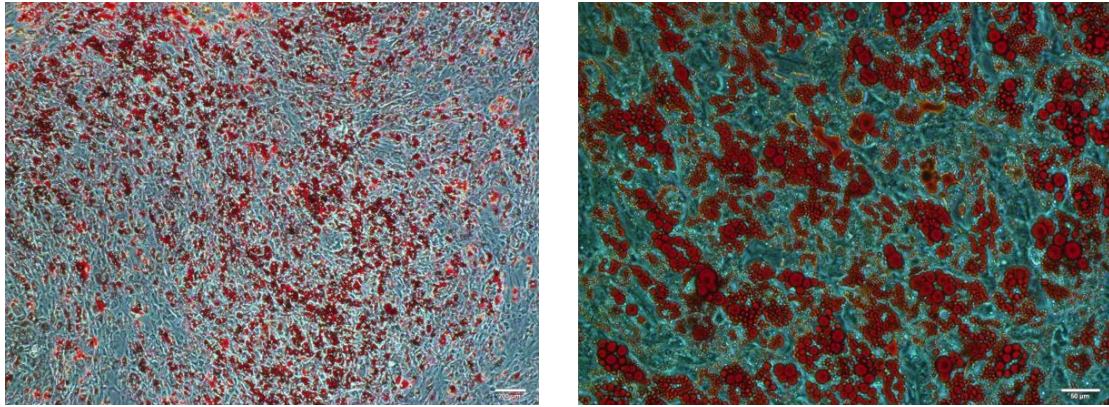

**Figure 2** Adipogenic differentiation of ADSCs

Oil red O staining confirmed adipogenic differentiation of ADSCs.

### 2.2 Osteogenic differentiation

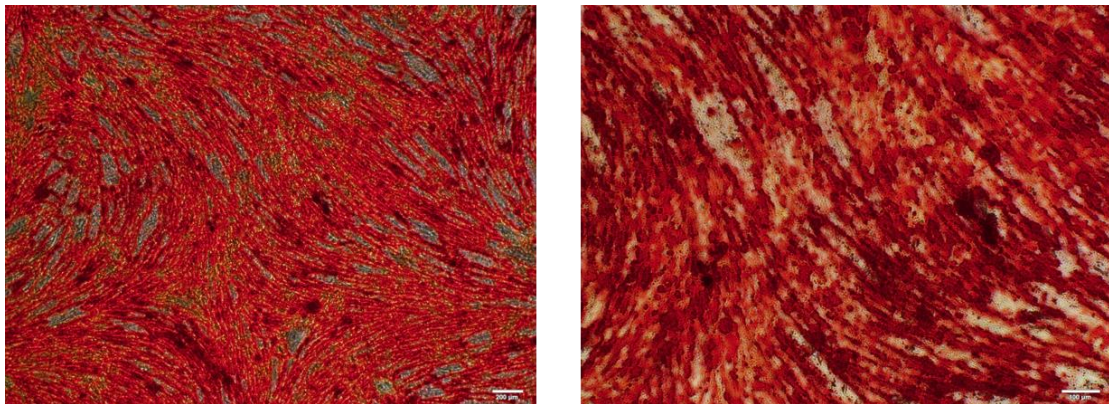

**Figure 3** Osteogenic differentiation of ADSCs

Alizarin red S staining confirmed osteogenic differentiation of ADSCs.

### 2.3 Chondrogenic differentiation

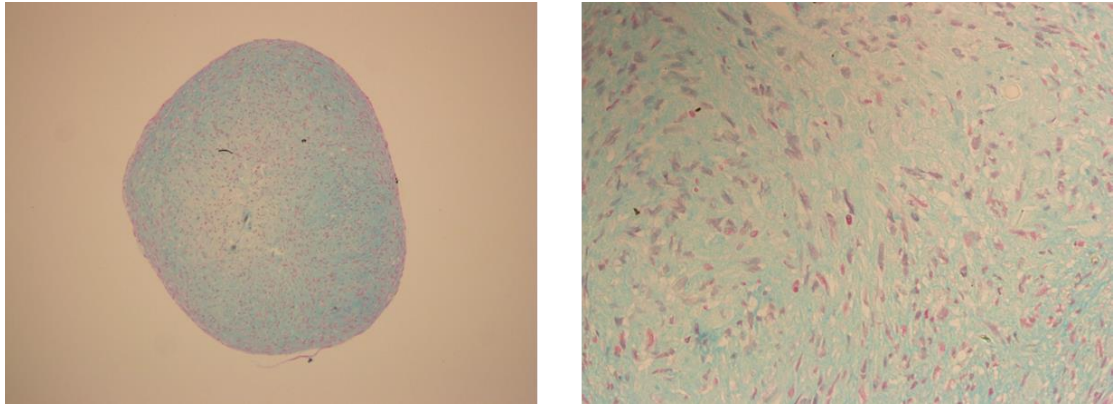

**Figure 4 Chondrogenic differentiation of ADSCs**

Alcian blue staining confirmed chondrogenic differentiation of ADSCs
